# Supplementary material for: Telomere Architecture Correlates with Aggressiveness in Multiple Myeloma
Source: MDPI journal article supplement (doi:10.3390/cancers13081969), 2021-04-19
Supplement: s1 [file s1]

# Supplementary Material: Telomere Architecture Correlates with Aggressiveness in Multiple Myeloma

Aline Rangel-Pozzo, Pak Lok Ivan Yu, Sadhana LaL, Yasmin Asbaghi, Luiza Sisdelli, Pille Tammur, Anu Tamm, Mari Punab, Ludger Klewes, Sherif Louis, Hans Knecht, Adebayo Olujohungbe and Sabine Mai

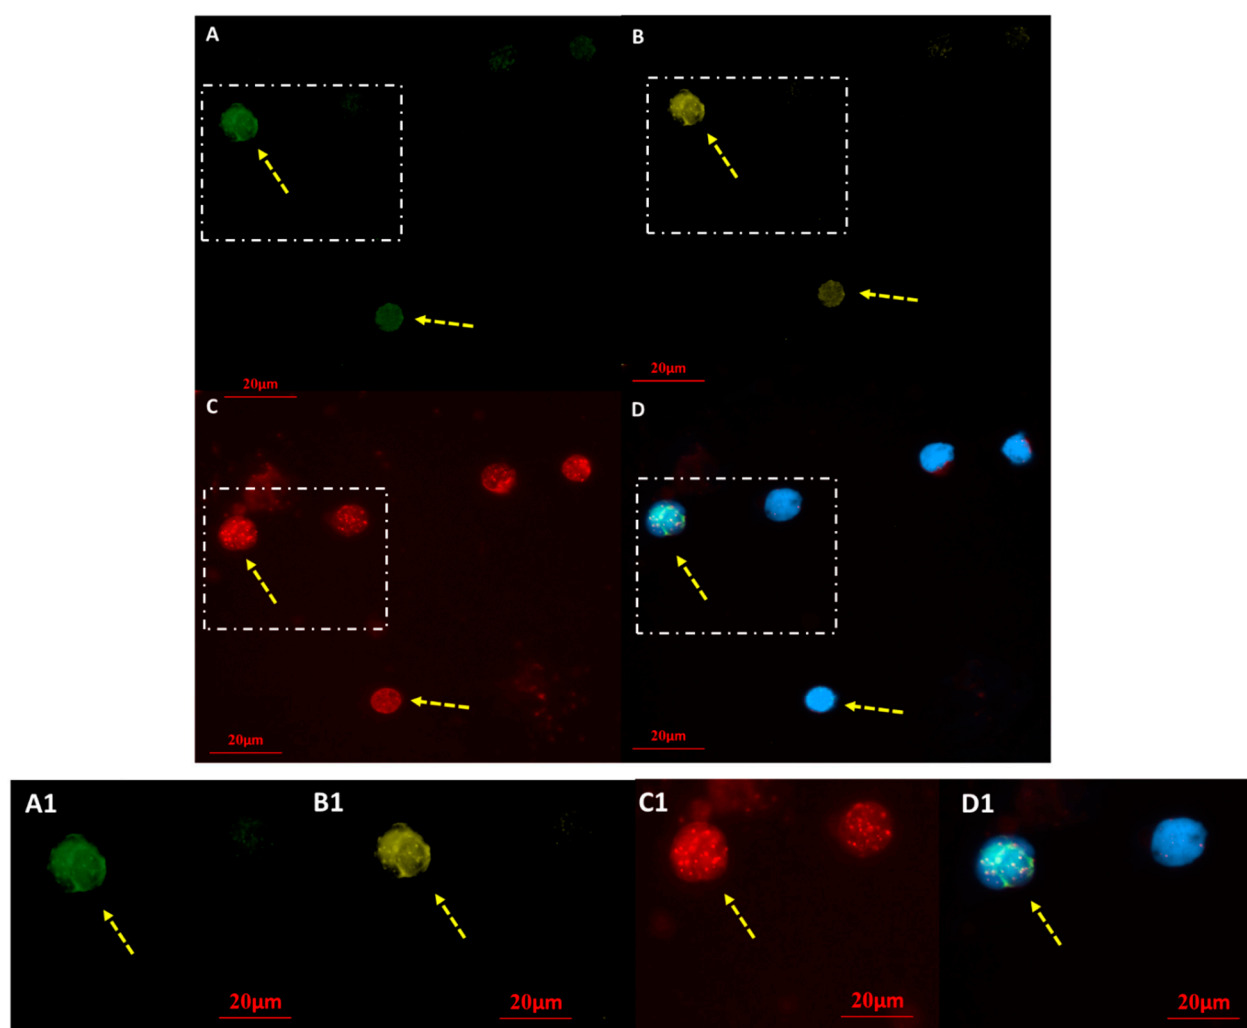

**Figure S1.** Immunostaining and Q-FISH in CD56+ and CD138+ malignant plasma cells (A–D). (A) CD56+ Myeloma cells fluoresce green with Alexa Fluor® 488 labelled anti-CD56 antibody, (see yellow arrows), and normal cells remain unstained. (B) CD138+ Myeloma cells stain yellow with Alexa Fluor® 594 labelled anti-CD138 antibody (see yellow arrows) while normal cells remained unstained. (C) The telomeres, hybridized with Cy3-labeled PNA probes, appear as red dots. (D) Merged image with Alexa Fluor® 488, Alexa Fluor® 594, Cy3-labeled PNA probes and the nuclei counterstained with DAPI (blue). Enlarged boxes are shown in (A1–D1). Their dual positive CD56 and CD138 staining can differentiate myeloma cells from normal lymphocytes and non-malignant plasma cells.

Table S1. Clinical data for participating patients.

| Patient Sample | Diagnosis | Age | BMPCS % | IgG  | IgA  | IgM  | Light Chain Isotype |        | Serum Free Light Chain |        |         | M Band g/L | Lytic Lesions | t(11;14) | t(4;14) | del13q14/13qter |
|----------------|-----------|-----|---------|------|------|------|---------------------|--------|------------------------|--------|---------|------------|---------------|----------|---------|-----------------|
|                |           |     |         |      |      |      | Kappa               | Lambda | Kappa                  | Lambda | Ratio   |            |               |          |         |                 |
| 1              | SMM       | 71  | 27      | 34.8 | 0.15 | 0.07 | Yes                 |        | -                      | -      | -       | 31         | No            | -        | -       | -               |
| 2              | MM        | 80  | 3.2     | 8.61 | 6.32 | 1.18 | IgA                 |        | 69.8                   | 22.6   | 3.09    | 3          | No            | -        | -       | -               |
| 3              | MM        | 51  | 63      | 106  | 0.18 | 0.09 | Yes                 |        | 84.9                   | 5.4    | 15.72   | 82         | No            | -        | -       | -               |
| 4              | MM        | 58  | 32      | 27.8 | 0.38 | 0.05 |                     | Yes    | 12.2                   | 610    | 0.02    | 20         | No            | -        | -       | -               |
| 5              | MM        | 86  | 46      | 72.1 | 0.27 | 0.11 | Yes                 |        | 505                    | 6.66   | 75.83   | 78         | No            | -        | -       | -               |
| 6              | MM        | 81  | 37.6    | 45.5 | 0.3  | 0.2  |                     | Yes    | 0                      | -      | 0       | 34         | No            | -        | -       | -               |
| 7              | MM        | 71  | 5.6     | 19.3 | 3.47 | 0.94 | Yes                 |        | 58.4                   | 21.4   | 2.73    | 4          | Yes           | -        | -       | -               |
| 8              | MM        | 74  | 85.4    | 61.2 | 0.28 | 0.18 | Yes                 |        | 526.5                  | 6.29   | 83.7    | 45         | Yes           | -        | -       | -               |
| 9              | MM        | 54  | 27.4    | 56.3 | 0.37 | 0.26 | Yes                 |        | 552.5                  | 6.01   | 91.93   | 56         | Yes           | -        | -       | -               |
| 10             | MM        | 75  | 16.6    | 33.8 | 1.95 | 0.3  |                     | Yes    | 13.5                   | 677.5  | 0.02    | 25         | Yes           | -        | -       | -               |
| 11             | MM        | 51  | 33      | 9.57 | 0.6  | 0.49 | Yes                 |        | 9.9                    | 16.6   | 0.6     | 6          | No            | -        | -       | -               |
| 12             | MM        | 81  | 36.6    | 3.05 | 20.8 | 0.04 | Yes                 |        | 737.5                  | 11     | 67.5    | 19         | No            | -        | -       | -               |
| 13             | MGUS      | 64  | 3       | 9.01 | 10.2 | 0.43 | Yes                 |        | 35.3                   | 11.6   | 3.04    | 12         | No            | -        | -       | -               |
| 14             | MM        | 93  | 25.4    | 14.8 | 0.24 | 0.08 | Yes                 |        | 17.8                   | 4.95   | 3.6     | 14         | Yes           | -        | -       | -               |
| 15             | MGUS      | 36  | 2.6     | 32   | 4.64 | 1.2  |                     | Yes    | N/D                    | N/D    | N/D     | 3          | No            | -        | -       | -               |
| 16             | MM        | 86  | 10.4    | 2.03 | 10.9 | 0.7  | Yes                 |        | 7.79                   | 10.5   | 0.74    | 12         | No            | -        | -       | -               |
| 17             | MM        | 55  | 42.2    | 9.48 | 1.26 | 0.61 |                     | Yes    | 8.89                   | 4050   | 0       | 7          | Yes           | -        | -       | -               |
| 18             | MM        | 70  | 24.8    | 8.29 | 0.55 | 0.19 | Yes                 |        | 2215                   | 12.3   | 180.08  | 7          | Yes           | -        | -       | -               |
| 19             | MM        | 85  | 26.8    | 21.6 | 0.29 | 0.06 | Yes                 |        | 975                    | 6.96   | 140.09  | 27         | Yes           | -        | -       | -               |
| 20             | MM        | 61  | 62.6    | 4.26 | 74.3 | 0.24 | Yes                 |        | 1985                   | 6.59   | 301.21  | 51         | No            | -        | -       | -               |
| 21             | MM        | 75  | 35.2    | 13.1 | 0.26 | 0.11 | IgG                 |        | -                      | -      | 120     | 10         | No            | -        | -       | -               |
| 22             | MM        | 71  | 18.2    | 3.69 | 0.64 | 0.16 |                     | Yes    | 3.48                   | 144    | 0.02    | 10         | No            | -        | -       | -               |
| 23             | MM        | 69  | 12.4    | 4.04 | 29.6 | 0.27 | Yes                 |        | 30.1                   | 9.21   | 3.27    | 28         | Yes           | -        | -       | -               |
| 24             | MGUS      | 76  | 3.4     | 8.2  | 4.81 | 2.19 |                     | Yes    | 27                     | 12.6   | 2.14    | 9          | No            | -        | -       | -               |
| 25             | MM        | 82  | 49      | 4.33 | 0.12 | 0.22 |                     | IgG    | 24.4                   | 132    | 0.19    | 2          | Yes           | -        | -       | -               |
| 26             | MM        | 59  | 85.6    | 1.74 | 98.4 | 0.1  |                     | Yes    | 3                      | 3700   | 0       | 52         | Yes           | -        | -       | -               |
| 27             | MM        | 62  | 20.2    | 102  | 0.17 | 0.04 | Yes                 |        | 2012.5                 | 6      | 3354    | 94         | Yes           | -        | -       | -               |
| 28             | MGUS      | 64  | 4       | 8.61 | 5.91 | 0.98 |                     | Yes    | 6.31                   | 37.2   | 0.17    | 9          | No            | -        | -       | -               |
| 29             | MM        | 54  | 2.8     | 7.95 | 0.93 | 0.56 | Yes                 |        | 2455                   | 6.2    | 395.97  | 12         | Yes           | -        | -       | -               |
| 30             | MM        | 59  | 3       | 6.52 | 0.68 | 0.47 | Yes                 |        | 440                    | 6.78   | 64.9    | 7          | Yes           | -        | -       | -               |
| 31             | MM        | 56  | 29.8    | 48.6 | 0.32 | 0.45 | Yes                 |        | 2650                   | 2.64   | 1003.79 | 36         | Yes           | -        | -       | -               |
| 32             | SMM       | 57  | 6.2     | 13.8 | 1.86 | 2.47 | Yes                 |        | 22.4                   | 8.02   | 2.79    | 7          | No            | -        | -       | -               |
| 33             | MM        | 70  | 50.8    | 64.5 | 0.15 | 0.11 |                     | Yes    | -                      | -      | 130     | 48         | No            | -        | -       | -               |
| 34             | MM        | 57  | 48.6    | 30   | 0.92 | 0.73 |                     | Yes    | 11.3                   | 542.5  | 0.02    | 24         | Yes           | -        | -       | -               |
| 35             | MM        | 75  | 66      | 25   | 45.7 | 0.48 | 0.65                |        | -                      | -      | 140     | 8          | Yes           | -        | -       | -               |
| 36             | MM        | 59  | 91.6    | 0.95 | 37.9 | 0.06 | Yes                 |        | -                      | -      | 166     | 37         | Yes           | -        | -       | -               |
| 37             | MM        | 55  | 0.8     | 25.4 | 0.71 | 0.18 | Yes                 |        | 620                    | 6.4    | 96.88   | 19         | Yes           | -        | -       | -               |
| 38             | MM        | 58  | 0.2     | 5.38 | 0.61 | 0.4  |                     |        | <3                     | 6.18   | <0.49   | 9          | No            | -        | -       | -               |

|    |      |    |      |      |       |       |                |     |        |       |         |     |     |   |   |   |
|----|------|----|------|------|-------|-------|----------------|-----|--------|-------|---------|-----|-----|---|---|---|
| 39 | MM   | 74 | 36.2 | 0.21 | 29.27 | 0.47  | Yes            |     | >4500  | 9.61  | >468.26 | 26  | Yes | - | - | - |
| 40 | MM   | 63 | 2.8  | N/A  | N/A   | N/A   | Yes            |     | 31.9   | 12.4  | 2.57    | 10  | Yes | - | - | - |
| 41 | MM   | 68 | 48.6 | 41.5 | 0.39  | 0.17  | Yes            |     | 102    | 7.55  | 13.51   | 33  | Yes | - | - | - |
| 42 | MM   | 64 | 6.6  | 32   | 1.34  | 1.17  |                | Yes | 12     | 80.1  | 0.15    | 22  | No  | - | - | - |
| 43 | MM   | 61 | 45.6 | 66.3 | 0.22  | 0.27  | Yes            |     | 727.5  | 5.66  | 128.53  | 53  | Yes | - | - | - |
| 44 | MM   | 70 | 16.2 | 22.8 | 0.86  | 0.69  | Yes            |     | 622.5  | 10.9  | 57.11   | 15  | No  | - | - | - |
| 45 | MM   | 81 | 14.6 | 6.22 | 11.6  | 0.89  | Yes            |     | 41.6   | 14.1  | 2.95    | 12  | Yes | - | - | - |
| 46 | MM   | 64 | 33   | 26.2 | 0.54  | 0.28  | Yes            |     | 1302.5 | 6.78  | 192.11  | 19  | No  | - | - | - |
| 47 | MM   | 75 | 61.6 | 4.98 | 0.4   | 0.34  | Yes            |     | >4500  | 12.1  | >371.9  | 12  | Yes | - | - | - |
| 48 | MGUS | 58 | 1.8  | 16   | 1.51  | 0.69  | Yes            |     | <3.3   | 6.5   | 0.51    | 2   | No  | - | - | - |
| 49 | MM   | 51 | 7.4  | 11.9 | 8.05  | 0.38  | Yes            |     | 15.8   | 10.6  | 1.49    | 2   | No  | - | - | - |
| 50 | MGUS | 85 | 1.2  | 14.7 | 2.06  | 0.61  | Yes            |     | 69.4   | 29.5  | 2.35    | 2   | No  | - | - | - |
| 51 | MM   | 60 | 61.8 | 1.75 | 77.2  | 0.04  |                | Yes | 4.19   | >4050 | 0       | 61  | Yes | - | - | - |
| 52 | MM   | 70 | 15.6 | 4.09 | 0.37  | 0.29  |                | Yes | <3.3   | 555   | 0.01    | 7   | Yes | - | - | - |
| 53 | MM   | 52 | 1.3  | 14.6 | 2.26  | 1.1   | Yes            |     | 14.1   | 12.3  | 1.15    | 3   | No  | - | - | - |
| 54 | MM   | 64 | 69   | 4.77 | 0.38  | 0.11  |                | Yes | 12.6   | 15.9  | 0.79    | 2   | Yes | - | - | - |
| 55 | MM   | 71 | **   | 34.5 | 0.24  | 0.36  |                | Yes | 18.1   | 465   | 0.04    | 26  | No  | - | - | - |
| 56 | MM   | 45 | 93   | 38.9 | 0.93  | 0.65  | Yes            |     | -      | -     | -       | 29  | No  | - | - | - |
| 57 | MM   | 65 | 45   | 5.51 | 22.6  | 0.12  | Yes            |     | >4500  | 94.3  | >47.72  | 13  | Yes | - | - | - |
| 58 | MM   | 81 | 91.2 | 73.9 | <0.07 | 0.05  | Yes            |     | -      | -     | <100    | 72  | No  | - | - | - |
| 59 | MGUS | 54 | 1.8  | 11.3 | 2.17  | 1.27  | Yes            |     | 15.8   | 14.1  | 1.12    | 2   | No  | - | - | - |
| 60 | MM   | 75 | 9.8  | 40.3 | 0.2   | 0.4   | Yes            |     | 12.5   | 6.54  | 1.91    | 31  | No  | - | - | - |
| 61 | MM   | 77 | 34   | 75.1 | 0.16  | 0.1   | Yes            |     | 0.01   | -     | <100    | 63  | Yes | - | - | - |
| 62 | MGUS | 39 | 3    | 11   | 9     | 10    | 0.82           |     | -      | -     | -       | 2   | No  | - | - | - |
| 63 | MM   | 73 | 9.2  | 6.3  | 14.6  | 0.33  | Yes            |     | 980    | 25.1  | 39.04   | 17  | Yes | - | - | - |
| 64 | MM   | 62 | 3    | 12.2 | 3.84  | 0.73  |                | Yes | 11.5   | 462.5 | 0.03    | 12  | Yes | - | - | - |
| 65 | MM   | 83 | 12.8 | 12.3 | 3.82  | 0.6   |                |     | 11.4   | 200   | <100    | 8   | Yes | - | - | - |
| 66 | MGUS | 84 | 5.4  | 8.26 | 4.05  | 14.1  | Yes            |     | >4500  | 402.5 | >11.18  | 9   | No  | - | - | - |
| 67 | MM   | 70 | 88.8 | 4.47 | 33.3  | 0.3   | Yes            |     | 117    | 8.82  | 13.27   | 20  | Yes | - | - | - |
| 68 | SMM  | 72 | 54.8 | 47.3 | 0.47  | 0.24  |                | Yes | 10.4   | 13.8  | 0.75    | 38  | No  | - | - | - |
| 69 | MM   | 56 | 26.6 | 25.7 | 0.17  | 0.18  | Yes            |     | 23.4   | 8.87  | 2.64    | 19  | Yes | - | - | - |
| 70 | MGUS | 60 | 5.6  | 9.31 | 5.83  | 0.96  | Yes            |     | 37.1   | 14.1  | 2.63    | 1   | No  | - | - | - |
| 71 | MM   | 37 | 73   | 7.82 | 1.14  | 0.36  | Yes            |     | 7.58   | 9     | 0.84    | 3   | Yes | - | - | - |
| 72 | MM   | 63 | 15.4 | 8.01 | 0.6   | 0.48  | Yes            |     | 94.3   | 7.34  | 12.85   | 12  | Yes | - | - | - |
| 73 | MGUS | 73 | 1.6  | 9.16 | 1.67  | 7.13  | Yes            |     | 29.7   | 16.3  | 1.82    | 2.1 | No  | - | - | - |
| 74 | MM   | 74 | 32.6 | 76.2 | <0.07 | <0.04 |                | Yes | <3     | 837.5 | 0       | 58  | No  | - | - | - |
| 75 | MM   | 81 | 14.6 | 16.1 | 17.9  | 0.51  |                | Yes | 41.7   | 104   | 0.4     | 9   | No  | - | - | - |
| 76 | MM   | 63 | 2.4  | 6.48 | 1.62  | 1.12  | Yes            |     | 7.98   | 7.42  | 1.08    | 8   | No  | - | - | - |
| 77 | SMM  | 82 | 9.2  | 29.9 | 0.46  | 0.4   | Yes            |     | 17.8   | 11.8  | 1.51    | 17  | No  | - | - | - |
| 78 | MM   | 60 | 44.6 | 5.53 | 0.42  | 0.54  |                | Yes | 6.22   | 377.5 | 0.02    | 2   | Yes | - | - | - |
| 79 | MM   | 80 | 88   | 4.59 | 45.9  | 0.09  | IgG and<br>IgA |     | 29.4   | 6.79  | 4.33    | 39  | -   | - | - | - |

|     |      |    |      |       |       |      |     |     |        |       |        |    |     |   |   |   |
|-----|------|----|------|-------|-------|------|-----|-----|--------|-------|--------|----|-----|---|---|---|
| 80  | MM   | 67 | 23   | 10.6  | 1.1   | 0.4  | Yes |     | -      | -     | <100   | 4  | No  | - | - | - |
| 81  | MM   | 62 | 46   | 34.3  | 0.67  | 0.18 |     | Yes | <2.7   | 108   | <0.03  | 29 | Yes | - | - | - |
| 82  | MM   | 54 | 40.8 | 53.4  | <0.07 | 0.15 | Yes |     | 11     | 4.61  | 2.39   | 48 | Yes | - | - | - |
| 83  | MM   | 50 | 4    | 12.7  | 4.98  | 0.89 | Yes |     | 86     | 54.4  | 1.58   | 7  | No  | - | - | - |
| 84  | MM   | 75 | 42.8 | 45.8  | 0.4   | 0.33 |     | Yes | 13.1   | 87.1  | 0.15   | 43 | No  | - | - | - |
| 85  | MM   | 48 | 14.8 | 57.4  | 2.48  | 0.26 |     | Yes | 20.4   | 2275  | 0.01   | 57 | Yes | - | - | - |
| 86  | MM   | 76 | 6.8  | 45.5  | 0.22  | 0.26 |     | Yes | 6.48   | 622.5 | 0.01   | 33 | Yes | - | - | - |
| 87  | SMM  | 74 | 11.4 | 12.7  | 3.92  | 0.89 | Yes |     | 21.5   | 40    | 0.54   | 7  | No  | - | - | - |
| 88  | MM   | 77 | 89.6 | 45.8  | 0.33  | 0.4  |     | Yes | 9.8    | 12    | 0.82   | 39 | No  | - | - | - |
| 89  | MM   | 50 | 18.6 | 32.1  | 3.31  | 1.37 | Yes |     | 79     | 17.6  | 4.49   | 23 | Yes | - | - | - |
| 90  | MM   | 70 | 13.2 | 10.5  | 1.46  | 0.55 |     | Yes | 9.98   | 270   | 0.04   | 10 | Yes | - | - | - |
| 91  | MM   | 67 | 34.4 | 6.95  | 37.8  | 0.14 | Yes |     | 12.4   | <2.6  | >4.77  | 24 | No  | - | - | - |
| 92  | MM   | 52 | 66.6 | 5.58  | 0.76  | 0.18 |     | Yes | 9.94   | >4400 | <0.00  | 6  | Yes | - | - | - |
| 93  | MM   | 68 | 80.4 | 64.1  | 0.15  | 0.14 | Yes |     | 1137.5 | 2.6   | 437.5  | 55 | No  | - | - | - |
| 94  | MM   | 68 | 55.8 | 41.5  | 0.18  | 0.07 | Yes |     | 45.6   | 3.46  | 13.18  | 29 | Yes | - | - | - |
| 95  | MM   | 64 | 23.4 | 56.3  | 0.34  | 0.24 | Yes |     | 42.5   | 3.82  | 11.13  | 49 | Yes | - | - | - |
| 96  | MM   | 68 | 85   | 66.9  | 0.95  | 0.34 | Yes |     | 680    | 2.6   | 261.54 | 56 | Yes | - | - | - |
| 97  | SMM  | 66 | 16.2 | 36.9  | 0.47  | 0.37 |     | Yes | 10.2   | 800   | 0.01   | 31 | No  | - | - | - |
| 98  | MGUS | 69 | 2.8  | 5.73  | 17.1  | 2.06 | Yes |     | 11.5   | 5.42  | 2.12   | 17 | No  | - | - | - |
| 99  | SMM  | 55 | 8.2  | 29.5  | 0.25  | 0.46 |     | Yes | <2.7   | 11.7  | 0.23   | 25 | No  | - | - | - |
| 100 | MM   | 78 | 30.2 | 74.6  | 0.13  | 0.11 | Yes |     | 1620   | 2.6   | 623.08 | 62 | Yes | - | - | - |
| 101 | MM   | 68 | 12.8 | 40.5  | 0.21  | 0.09 | Yes |     | -      | -     | <100   | 32 | Yes | - | - | - |
| 102 | MM   | 81 | 5.8  | 42.2  | 0.2   | 0.15 | Yes |     | 970    | 17.2  | 56.4   | 41 | Yes | - | - | - |
| 103 | MM   | 81 | 65.2 | 31.3  | 0.08  | 0.21 |     | Yes | <2.7   | 972.5 | <100   | 35 | Yes | - | - | - |
| 104 | MGUS | 51 | 5.2  | 8.8   | 0.97  | 5.84 |     | Yes | 2.83   | 12    | 0.24   | 4  | No  | - | - | - |
| 105 | MM   | 67 | 52   | 85.8  | 0.07  | 0.11 |     | Yes | 12.5   | 277.5 | 0.05   | 84 | No  | - | - | - |
| 106 | MM   | 75 | 13.6 | 32.01 | 0.55  | 0.09 |     | Yes | <2.7   | 672.5 | <100   | 24 | Yes | - | - | - |
| 107 | MM   | 70 | 34.8 | 10    | 0.6   | 0.22 | Yes |     | 2.7    | 7.8   | 0.35   | 50 | Yes | - | - | - |
| 108 | MM   | 45 | 68.6 | 2.21  | 72.6  | 0.31 |     | Yes | <2.7   | >4400 | <100   | 58 | No  | - | - | - |
| 109 | MM   | 70 | 12.6 | 7.65  | 11.2  | 1.13 |     | Yes | 37.9   | 327.5 | 0.12   | 12 | No  | - | - | - |
| 110 | MM   | 74 | 43.6 | 55.7  | 0.09  | 0.11 | Yes |     | 145    | 3.5   | 41.43  | 43 | No  | - | - | - |
| 111 | SMM  | 88 | 12   | 6.05  | 24.5  | 0.22 | Yes |     | 143    | 16.9  | 8.46   | 18 | No  | - | - | - |
| 112 | SMM  | 79 | 15   | 24.8  | 2.1   | 1.06 | Yes |     | 272.5  | 16.3  | 16.72  | 16 | -   | - | - | - |
| 113 | MM   | 58 | 10.8 | 8.32  | 0.62  | 0.26 | Yes |     | 3.28   | 5.09  | 0.64   | 3  | Yes | - | - | - |
| 114 | SMM  | 79 | 9.8  | 19.7  | 1.04  | 0.68 |     | Yes | 13.5   | 33.6  | 0.4    | 12 | No  | - | - | - |
| 115 | MM   | 68 | 15   | 10.6  | 0.5   | 0.28 |     |     | 12.8   | 5.58  | 2.29   | 12 | No  | - | - | - |
| 116 | SMM  | 69 | 12   | 15.4  | 2.9   | 0.47 |     | Yes | 8.94   | 10.3  | 0.87   | 3  | No  | - | - | - |
| 117 | SMM  | 82 | 8.4  | 30    | 0.11  | 0.06 | Yes |     | 14.3   | 6.08  | 2.35   | 20 | No  | - | - | - |
| 118 | MM   | 63 | 94   | 2.09  | 0.09  | 0.06 |     | Yes | <3.15  | >4200 | <100   | 10 | Yes | - | - | - |
| 119 | SMM  | 63 | 18.2 | 2.96  | 14    | 0.8  |     | Yes | 3.73   | 213   | 0.02   | 11 | No  | - | - | - |
| 120 | SMM  | 87 | 20   | 42.5  | 0.24  | 0.16 | Yes |     | 325    | 8.85  | 36.72  | 28 | No  | - | - | - |
| 121 | MGUS | 67 | 5    | 6.64  | 12.7  | 0.21 |     | IgA | <3.15  | 70.9  | 0.04   | 5  | No  | - | - | - |

|     |      |    |      |      |      |       |      |     |        |        |          |             |     |    |   |   |
|-----|------|----|------|------|------|-------|------|-----|--------|--------|----------|-------------|-----|----|---|---|
| 122 | SMM  | 83 | 9.6  | 34.5 | 0.91 | 0.8   | Yes  |     | 24.3   | 2.45   | 9.92     | 23          | No  | -  | - | - |
| 123 | MM   | 62 | 14   | 29.8 | 0.28 | 0.52  | Yes  |     | 762.5  | 2.61   | 292.15   | 17          | Yes | -  | - | - |
| 124 | MM   | 58 | 20.6 | 18.3 | 0.44 | 0.14  |      | IgG | 7.42   | 11     | 0.08     | 10          | Yes | -  | - | - |
| 125 | MGUS | 57 | 2    | 11.1 | 1.53 | 2.67  | IgM  |     | 8.51   | 7.92   | 1.08     | 1           | No  | -  | - | - |
| 126 | MM   | 66 | 35   | 12.2 | 0.99 | 1.67  | IgG  |     | 27.5   | 22.3   | 1.23     | 3           | Yes | -  | - | - |
| 127 | MGUS | 65 | 9.8  | 3.99 | 0.07 | 13.5  | IgM  |     | >4725  | 325    | >14.54   | 5           | No  | -  | - | - |
| 128 | MM   | 47 | 30   | 65.3 | 0.8  | 0.39  | Yes  |     | 32.4   | 12.5   | 2.59     | 53          | No  | -  | - | - |
| 129 | SMM  | 61 | 11.4 | 27   | 2.53 | 0.27  | IgG  |     | 29.3   | 21.1   | 1.39     | 15          | No  | -  | - | - |
| 130 | MM   | 81 | 40   | 3.05 | 0.4  | 0.09  |      |     | >4950  | 3.45   | >1434.78 | 12          | No  | -  | - | - |
| 131 | SMM  | 86 | 13   | 30.5 | 0.47 | 0.42  | IgG  |     | 43.5   | 8.52   | 5.11     | 25          | N/A | -  | - | - |
| 132 | MGUS | 72 | 3    | 8.56 | 0.34 | 57    | IgM  | IgG | 26.9   | 12.9   | 2.09     | 2           | No  | -  | - | - |
| 133 | MGUS | 73 | 4    | 14.1 | 3.35 | 0.73  | IgG  |     | -      | -      | -        | 6           | No  | -  | - | - |
| 134 | SMM  | 80 | 23   | 27.2 | 1.19 | 1.25  | IgG  |     | 419.22 | 9.08   | 46.17    | 14          | No  | -  | - | - |
| 135 | SMM  | 62 | 20.2 | 46.5 | 0.15 | 0.39  | IgG  |     | 17.2   | 5.65   | 3.04     | 38          | No  | -  | - | - |
| 136 | MM   | 62 | 40   | 44.6 | 0.25 | 0.15  | IgG  |     | 463.57 | 0.5    | 927.14   | 32          | No  | -  | - | - |
| 137 | MM   | 62 | 13   | 62   | 42.7 | <0.15 | 0.1  |     | -      | -      | <100     | 12          | Yes | -  | - | - |
| 138 | SMM  | 75 | 15   | 16.2 | 26.9 | 3.47  | 0.37 |     | -      | -      | -        | 4           | No  | -  | - | - |
| 139 | MM   | 65 | 33   | 5.43 | 0.25 | 0.17  | IgG  |     | 10.7   | 6.65   | 1.61     | 1           | No  | -  | - | - |
| 140 | SMM  | 64 | 32   | 22   | 0.99 | 0.41  |      | IgG | 62.37  | 4.63   | 13.47    | 11          | -   | -  | - | - |
| 141 | MM   | 83 | 17   | 2.84 | 0.14 | 0.07  |      |     | 1778   | 0.53   | 3354.7   | Not present | Yes | -  | - | - |
| 142 | MM   | 70 | 15   | 65   | 42.9 | <0.15 | 0.1  |     | -      | -      | <100     | 12          | Yes | -  | - | - |
| 143 | MM   | 58 | 22   | 58   | 42.7 | <0.15 | 0.1  |     | -      | -      | <100     | 15          | Yes | -  | - | - |
| 144 | SMM  | 58 | 20   | 26.2 | 36.6 | 0.77  | 0.37 |     | -      | -      | -        | 5           | No  | -  | - | - |
| 145 | MM   | 58 | 25   | 60.1 | 48.7 | <0.15 | 0.1  |     | -      | -      | <100     | 20          | No  | -  | - | - |
| 146 | MM   | 59 | 12   | 60.9 | 42.9 | <0.15 | 0.1  |     | -      | -      | <100     | 11          | No  | -  | - | - |
| 147 | MM   | 58 | 17   | 52   | 10   | <0.15 | 0.1  |     | -      | -      | <100     | 14          | No  | -  | - | - |
| 148 | SMM  | 45 | 15   | 16.2 | 40   | 0.47  | 0.37 |     | -      | -      | -        | 5           | No  | -  | - | - |
| 149 | MGUS | 59 | 5    | 10.5 | 9.6  | 10.5  | 0.98 |     | -      | -      | -        | 2           | No  | -  | - | - |
| 150 | MM   | 90 | 20   | 60   | 42.7 | <0.15 | 0.1  |     | -      | -      | <100     | 14          | Yes | -  | - | - |
| 151 | MM   | 52 | 22   | 56   | 23   | <0.15 | 0.1  |     | -      | -      | <100     | 18          | Yes | -  | - | - |
| 152 | MM   | 55 | 27   | 63   | 34   | <0.15 | 0.1  |     | -      | -      | <100     | 20          | Yes | -  | - | - |
| 153 | SMM  | 56 | 14   | 20   | 23   | 0.47  | 0.37 |     | -      | -      | -        | 7           | No  | -  | - | - |
| 154 | MM   | 71 | 30   | 60   | 42.7 | <0.15 | 0.1  |     | -      | -      | <100     | 22          | Yes | -  | - | - |
| 155 | MM   | 62 | 33   | 66   | 22.7 | <0.15 | 0.1  |     | -      | -      | <100     | 21          | Yes | -  | - | - |
| 156 | MGUS | 82 | 2    | 5.7  | 0.57 | 6.58  |      |     | 35.08  | 11.81  | 2.97     | 3.4         | No  | No | - | - |
| 157 | MGUS | 52 | 2    | 6.7  | 5.13 | 0.61  |      | Yes | 10.54  | 203.69 | 0.05     | 2.1         | No  | No | - | - |
| 158 | MGUS | 75 | 2.5  | 12.8 | 2.34 | 1.59  | Yes  |     | 31.06  | 21.06  | 1.47     | 4.3         | No  | No | - | - |
| 159 | MGUS | 50 | 2    | 8.9  | 1.96 | 6.99  | Yes  |     | 2.31   | 1.19   | 1.94     | 6           | No  | No | - | - |
| 160 | MGUS | 72 | 2    | 19.3 | 0.73 | 0.38  |      | Yes | 13.51  | 15.32  | 0.88     | 9.4         | No  | No | - | - |
| 161 | MGUS | 84 | 3    | 16.9 | 1.71 | 0.96  | Yes  |     | 21.33  | 21.82  | 0.97     | 7.4         | No  | No | - | - |
| 162 | MGUS | 64 | 2    | 16.3 | 2.26 | 0.89  | Yes  |     | 25.47  | 15.93  | 1.6      | 4.8         | No  | No | - | - |

|     |      |    |        |      |       |       |     |     |        |         |        |         |     |     |     |    |
|-----|------|----|--------|------|-------|-------|-----|-----|--------|---------|--------|---------|-----|-----|-----|----|
| 163 | MGUS | 53 | 3      | 14.9 | 2.16  | 1.71  |     | Yes | 10.49  | 12.51   | 0.84   | 5.4     | No  | No  | -   | -  |
| 164 | MGUS | 56 | 3      | 13.6 | 0.49  | 0.39  |     | Yes | 0.08   | 7.56    | 91.37  | 7.9     | No  | No  | No  | No |
| 165 | MGUS | 69 | 4      | 10.4 | 9.53  | 1.39  | Yes |     | 28.3   | 24.13   | 1.17   | 5       | No  | No  | -   | -  |
| 166 | MGUS | 73 | 2      | 17   | 1.34  | 1.55  | Yes |     | 44.04  | 12.06   | 3.65   | 8.6     | No  | No  | -   | -  |
| 167 | MGUS | 74 | 0      | 15.1 | 1.5   | 4     |     |     | -      | -       | -      | 7       | No  | No  | -   | -  |
| 168 | MGUS | 71 | 2      | 27.1 | 1.23  | 1.08  | Yes |     | 6.39   | 1.58    | 4.04   | 16      | No  | No  | -   | -  |
| 169 | MGUS | 73 | 1.2    | 14.6 | 2.18  | 1.15  |     |     | 18.13  | 13.32   | 1.36   | 6.2     | No  | No  | -   | -  |
| 170 | MGUS | 69 | 4      | 20   | 3.5   | 0.75  | Yes |     | 3.65   | 3.72    | 0.98   | 13.6    | No  | No  | -   | -  |
| 171 | MGUS | 64 | 1.5    | 11.3 | 1.49  | 0.63  |     |     | 12.55  | 13.58   | 0.92   | 5.2     | No  | No  | -   | -  |
| 172 | MGUS | 69 | 2      | 15   | 2.24  | 0.53  |     | Yes | 26.24  | 45.53   | 0.58   | 4.7     | No  | No  | -   | -  |
| 173 | MGUS | 67 | 3      | 15.7 | 0.23  | 0.24  | Yes |     | 10.58  | 6.27    | 1.69   | 13.4    | No  | No  | -   | -  |
| 174 | MGUS | 75 | 2      | 22.6 | 0.84  | 0.56  |     |     | 13.58  | 9.87    | 1.38   | 15.8    | No  | Yes | No  | No |
| 175 | MGUS | 74 | 2      | 15.3 | 1.69  | 0.31  |     |     | 22.02  | 33.92   | 0.65   | 7       | No  | No  | -   | -  |
| 176 | MGUS | 63 | 3      | 13.7 | 2     | 1.05  |     | Yes | 18.5   | 26.68   | 0.69   | 7.5     | No  | No  | -   | -  |
| 177 | MGUS | 68 | 4      | 9    | 2.8   | 1.3   |     | Yes | 11.13  | 11.58   | 0.96   | 3.5     | No  | No  | No  | No |
| 178 | MGUS | 83 | 2      | 16.8 | 1.38  | 0.71  |     | Yes | 17.16  | 21.47   | 0.8    | 13.7    | No  | No  | No  | No |
| 179 | MGUS | 62 | 1.2    | 8.8  | 6     | 1.14  |     | Yes | 18.68  | 106.37  | 0.18   | 1.8     | No  | No  | -   | -  |
| 180 | MGUS | 42 | 1.5    | 8.3  | 1.37  | 1.13  | Yes |     | 11.84  | 116.89  | 0.1    | 3.4     | No  | No  | -   | -  |
| 181 | MGUS | 68 | 5      | 18   | 3.78  | 2.4   | Yes |     | 22.37  | 17.86   | 1.25   | 9.6     | No  | No  | -   | -  |
| 182 | MGUS | 72 | 4      | 11.3 | 2.18  | 1.37  | Yes |     | 23.74  | 19.94   | 1.19   | 3.5     | No  | No  | No  | No |
| 183 | MGUS | 54 | 1      | 8.5  | 4.74  | 0.96  |     | Yes | 10.6   | 32.37   | 0.33   | 4.1     | No  | No  | -   | -  |
| 184 | MGUS | 83 | 1      | 9.3  | 10.3  | 0.82  |     | Yes | 22.48  | 27.08   | 0.83   | 4.6     | No  | No  | -   | -  |
| 185 | MGUS | 80 | 1      | 9.3  | 10.73 | 0.93  |     | Yes | -      | -       | -      | 7.8±2.3 | No  | No  | -   | -  |
| 186 | MGUS | 69 | 5      | 11.6 | 3.36  | 1.46  | Yes |     | 22.17  | 13.83   | 1.6    | 0       | -   | -   | -   | -  |
| 187 | MGUS | 77 | 3      | 10.8 | 3.1   | 0.85  | Yes |     | 35.67  | 21.95   | 1.63   | 2.7     | No  | No  | -   | -  |
| 188 | MGUS | 64 | 5      | 13.9 | 2.64  | 0.88  | Yes |     | 22.31  | 14.8    | 1.5    | 8.6     | No  | No  | Yes | No |
| 189 | MGUS | 57 | 3-4    | 11.8 | 3.15  | 1.32  |     | Yes | 17.48  | 11.8    | 1.32   | 2.2     | No  | No  | No  | No |
| 190 | MGUS | 61 | 3      | 10.8 | 0.82  | 0.78  |     |     | -      | -       | -      | 6.4     | No  | No  | -   | -  |
| 191 | MM   | 61 | 5      | 13.6 | 2.08  | 1     |     | Yes | 24.56  | 21.63   | 1.14   | 6.8     | No  | No  | No  | No |
| 192 | MM   | 60 | 2      | 11.6 | 2.22  | 1.43  | Yes |     | 47.02  | 23.68   | 1.99   | 5       | No  | No  | -   | -  |
| 193 | MM   | 71 | 90     | 3.7  | 33.4  | <0.05 |     | Yes | 10.96  | 2317.75 | 0      | 25.5    | Yes | Yes | -   | -  |
| 194 | MM   | 37 | 90     | 76   | <0.15 | <0.05 |     | Yes | 10.46  | 3092.7  | 0      | 48      | Yes | Yes | -   | -  |
| 195 | MM   | 85 | 90     | 3    | 0.25  | <0.05 |     | Yes | 18.18  | 7909    | 0      | 1.8     | Yes | Yes | No  | No |
| 196 | MM   | 89 | 75     | 11.1 | 0.24  | 0.06  | Yes |     | -      | -       | -      | 5.2     | Yes | Yes | -   | -  |
| 197 | MM   | 75 | 95     | 5.9  | 0.34  | <0.05 |     | Yes | 3.68   | 2295    | 0      | 3.4     | No  | No  | No  | No |
| 198 | MM   | 76 | 95-100 | 40.2 | 0.28  | <0.05 |     | Yes | 13.78  | 5469    | 0      | 34.6    | Yes | Yes | No  | No |
| 199 | MM   | 71 | 95     | 61.6 | <0.3  | <0.05 | Yes |     | 710.34 | 16.01   | 44.37  | 60.3    | Yes | Yes | -   | -  |
| 200 | MM   | 52 | 15     | 84.8 | 0.36  | 0.17  | Yes |     | 1529.4 | 13.45   | 113.7  | 42.6    | Yes | Yes | No  | No |
| 201 | MM   | 64 | 60     | 42.7 | <0.15 | 0.1   | Yes |     | 297.78 | 12.24   | 24.33  | 35.1    | Yes | Yes | Yes | No |
| 202 | MM   | 87 | 50     | 37.5 | 0.49  | 0.65  |     |     | 15.28  | 6.82    | 2.24   | 31      | No  | No  | -   | -  |
| 203 | MM   | 74 | 25     | 24   | 0.4   | 0.31  | Yes |     | 757.99 | 3.53    | 214.73 | 19      | Yes | Yes | Yes | No |
| 204 | MM   | 70 | 90     | 66.2 | 0.54  | 0.34  | Yes |     | 288.92 | 5.7     | 50.69  | 74.3    | Yes | Yes | No  | No |

|     |    |    |       |      |       |       |     |     |         |         |         |      |     |     |     |     |
|-----|----|----|-------|------|-------|-------|-----|-----|---------|---------|---------|------|-----|-----|-----|-----|
| 205 | MM | 60 | 70    | 3.1  | 43.6  | 0.16  |     | Yes | 12.64   | 0.02    | 821.51  | 36.9 | No  | No  | Yes | No  |
| 206 | MM | 87 | 50    | 41.5 | <0.15 | 0.13  | Yes |     | 691.17  | 3.09    | 223.68  | 29   | Yes | Yes | Yes | Yes |
| 207 | MM | 58 | 30-40 | 25.2 | <0.15 | 0.12  | Yes |     | 32.52   | 3.82    | 8.51    | 21.9 | No  | No  | Yes | No  |
| 208 | MM | 68 | 60    | 4.8  | 0.6   | 0.42  | Yes |     | 27300   | 17.38   | 1570.77 | 17   | Yes | Yes | No  | No  |
| 209 | MM | 89 | 15    | 24.1 | 0.17  | 0.16  | Yes |     | 57.45   | 7.99    | 7.19    | 26.2 | Yes | Yes | -   | -   |
| 210 | MM | 84 | 25    | 45.4 | 0.42  | 0.65  | Yes |     | 47.07   | 2.59    | 18.17   | 41   | Yes | Yes | No  | No  |
| 211 | MM | 69 | 90    | 59.2 | 0.25  | 0.16  | Yes |     | 4470.74 | 7.49    | 596.89  | 79   | Yes | Yes | Yes | Yes |
| 212 | MM | 60 | 80    | 60.6 | <0.15 | 0.37  | Yes |     | 1292.13 | 8.8     | 146.83  | 67.3 | Yes | Yes | Yes | No  |
| 213 | MM | 68 | 85    | 45.9 | <0.15 | <0.15 |     | Yes | 11.7    | 3361.35 | 0       | 44.7 | Yes | Yes | No  | No  |
| 214 | MM | 88 | 20    | 7.5  | 0.69  | 0.38  |     |     | 95.62   | 10.36   | 9.23    | 0    | Yes | Yes | No  | No  |

**Table S2.** Basic clinical characteristics of the study SMM and MM subpopulation.

| Groups                               | SMM        |              | MM            |                |
|--------------------------------------|------------|--------------|---------------|----------------|
|                                      | Stable     | High-risk    | Stable        | Progression    |
| Number of Patients                   | 15         | 5            | 85            | 48             |
| Basic Clinical Characteristics       |            |              |               |                |
| Age                                  | 69.9 ± 9.5 | 74.2 ± 11.8  | 65.2 ± 11.7   | 71.5 ± 9.8     |
| BMPC (%)                             | 3.4 ± 1.7  | 21.88 ± 18.8 | 36.2 ± 27.6   | 41.5 ± 30.0    |
| M-protein                            | 15.9 ± 7.1 | 19.4 ± 13.5  | 25.2 ± 21.5   | 30.6 ± 21.5    |
| IgG (%)                              | 23.5       | 30.48        | 30.5          | 29.6           |
| IgA (%)                              | 5.3        | 5.6          | 8.8           | 10.2           |
| IgM (%)                              | 0.8        | 0.4          | 0.3           | 0.3            |
| Lytic lesions (%)                    | 0          | 0            | 51/85 (60.0%) | 88/134 (65.7%) |
| Cytogenetic information              |            |              |               |                |
| Patients with t(11;14) (%)           | N/A        | N/A          | 7/10 (70.0%)  | 11/14 (78.5%)  |
| Patients with t(4;14) (%)            | N/A        | N/A          | 4/8 (50.0%)   | 3/9 (33.3%)    |
| Patients with del(14q1.3)/13qter (%) | N/A        | N/A          | 2/8 (25.0%)   | 0/9 (0%)       |

BMPC indicates the degree of bone marrow plasma cell infiltration; M-protein indicates the serum level of myeloma protein. IgG, IgA, and IgM indicate the percentage of patients per cohort with each of the 3 isotypes of immunoglobulin heavy chain as the predominant isotype; n.d. is the percentage of patients whose immunoglobulin isotype data were unavailable. Numbers represent average values along with the maximal variance within them.

**Table S3.** Multivariate modelling of telomere signals by age and diagnosis using only the MM group.

| Analysis of Maximum Likelihood Estimates |    |                    |                |            |            |              |                                    |
|------------------------------------------|----|--------------------|----------------|------------|------------|--------------|------------------------------------|
| Parameter                                | DF | Parameter Estimate | Standard Error | Chi-Square | Pr > ChiSq | Hazard Ratio | 95% Hazard Ratio Confidence Limits |
| avint                                    | 1  | -0.56609           | 0.15467        | 13.3946    | 0.0003     | 0.568        | 0.419 0.769                        |
| tnagg                                    | 1  | 0.30461            | 0.13345        | 5.2101     | 0.0225     | 1.356        | 1.044 1.761                        |
| Age                                      | 1  | 0.05144            | 0.01495        | 11.8432    | 0.0006     | 1.053        | 1.022 1.084                        |

The measure of effect is the hazard ratio, which is the risk of failure (i.e., the risk or probability of suffering the event in question). If the hazard ratio is less than 1, then the predictor is protective (i.e., associated with improved survival). On the other hand, if the hazard ratio is greater than 1, then the predictor is associated with increased risk (or decreased survival). The *p* value shows statistically significant associations between the first column parameters with mortality. DF—degree of freedom, each predictor occupies 1 degree of freedom in the model. DF—degree of freedom, each predictor occupies 1 degree of freedom in the model. Avint—average intensity of telomere signals, tnagg—total number of telomere aggregates.
